# Supplementary material for: Optical and computational study of the trans ↔ cis reversible isomerization of the commercial bis-azo dye Bismarck Brown Y
Source: Royal Society of Chemistry journal article supplement (doi:10.1039/d2cp05010b), 2023-01-01
Supplement: d2cp05010b1.pdf [file d2cp05010b1.pdf]

Supplementary Information for:

## Optical and Computational Study of the *trans* ↔ *cis* Reversible Isomerization of the Commercial Bis-Azo Dye Bismarck Brown Y

Kayrel E.K. Edwards,<sup>a</sup> Ozzy Mermut,<sup>b</sup> William J. Pietro,<sup>c</sup> and Christopher J. Barrett,<sup>a,b\*</sup>

a. Department of Chemistry, McGill University, Montreal QC, Canada,

b. Department of Physics and Astronomy, York University, Toronto ON, Canada,

c. Department of Chemistry, York University, Toronto ON, Canada.

### Photolysis Kinetics Analysis

Bismarck Brown Y can undergo two reversible *cis/trans* isomerization processes.

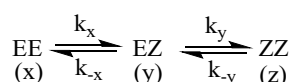

Isomerizations EE → EZ and EZ → ZZ are photo-driven. The reverse (*cis-trans*) processes are thermally driven. Concentrations  $x$ ,  $y$ , and  $z$  are related to each other through differential equations (5)

$$\frac{dx}{dt} = -k_x\phi x + k_{-x}y$$

$$\frac{dy}{dt} = k_x\phi x - k_{-x}y - k_y\phi y + k_{-y}z \quad (5)$$

$$\frac{dz}{dt} = k_y\phi y - k_{-y}z$$

where  $\phi$  is the photon flux. We can determine the time profile of all concentrations by solving equations (5). This is best done numerically by defining a series of incremental time-slices,  $i$ , having period  $\Delta t$ , and solving the system numerically as shown in equation (6). Discretization gives:

$$\frac{x_i - x_{i-1}}{\Delta t} = -k_x\phi x_i + k_{-x}y_i$$

$$\frac{y_i - y_{i-1}}{\Delta t} = k_x\phi x_i - (k_{-x} + k_y\phi)y_i + k_{-y}z_i \quad (6)$$

$$\frac{z_i - z_{i-1}}{\Delta t} = k_y\phi y_i - k_{-y}z_i$$

and collecting time-slices:

$$\left(\frac{1}{\Delta t} + k_x\phi\right)x_i - k_{-x}y_i = \frac{x_{i-1}}{\Delta t}$$

with corresponding expressions for  $y$  and  $z$ . This system can be solved recursively for each time-slice  $i$ , by matrix equation (7)

$$AC_i = \frac{1}{\Delta t}C_{i-1} \quad (7)$$

where  $C_i$  is the concentration vector

$$C_i = \begin{bmatrix} x_i \\ y_i \\ z_i \end{bmatrix} \quad (8)$$

expressed in expanded form as

$$\begin{bmatrix} \left(\frac{1}{\Delta t} + k_x\right) & -k_{-x} & 0 \\ -k_x\emptyset & \left(\frac{1}{\Delta t} + k_{-x} + k_y\emptyset\right) & -k_{-y} \\ 0 & -k_y\emptyset & \left(\frac{1}{\Delta t} + k_{-y}\right) \end{bmatrix} \begin{bmatrix} x_i \\ y_i \\ z_i \end{bmatrix} = \frac{1}{\Delta t} \begin{bmatrix} x_{i-1} \\ y_{i-1} \\ z_{i-1} \end{bmatrix} \quad (9)$$

### Calculation of Rate Constants

Rate constants,  $k_x$ ,  $k_{-x}$ ,  $k_y$ , and  $k_{-y}$  (equation 9), were calculated from DFT energies of the corresponding species in accordance with transition state theory. The algorithm starts by loading vector  $C_{-1}$  with initial conditions ( $x = [EE]_0$ ,  $y = 0$ ,  $z = 0$ ), and evaluating the elements of matrix  $A$ . Vector  $C_i$  (equation 8) is then determined by recursively solving equation (3) via a standard LU decomposition for each time-slice,  $i$ .

### Pump-Probe Isomerization Spectroscopy Data

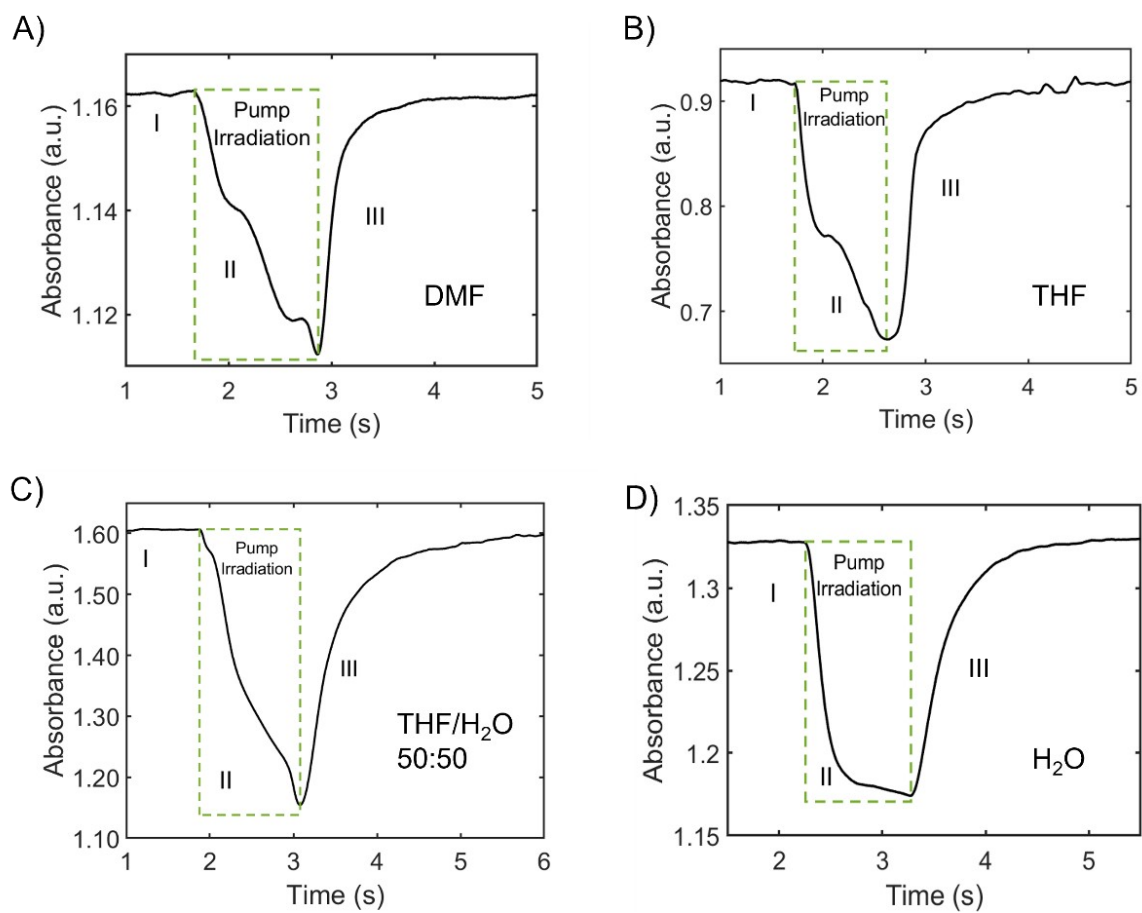

**Figure S1.** The absorbance vs time profiles of BBY in solvents (a) DMF, (b) THF, (c) THF/H<sub>2</sub>O, and (d) H<sub>2</sub>O. (I) Before irradiation, (II) during 1s pulse with 532nm laser, (III) *cis* decay in dark.

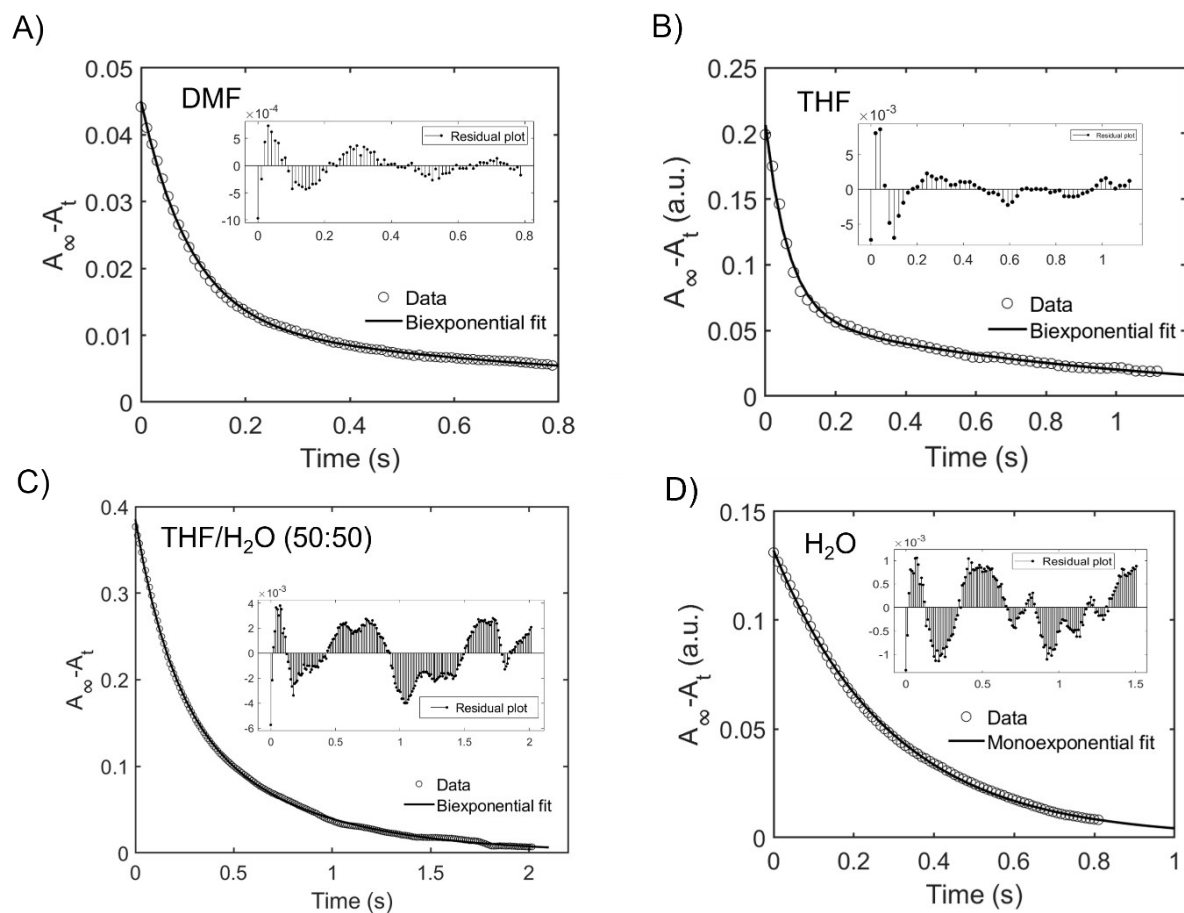

**Figure S2.** The decay of *cis* isomer fit to biexponential kinetics of BBY in solvents (a) DMF, (b) THF, (c) THF/H<sub>2</sub>O, and (d) H<sub>2</sub>O. The inset shows the residual plot between our least-squares four-parameter biexponential fit and the data.

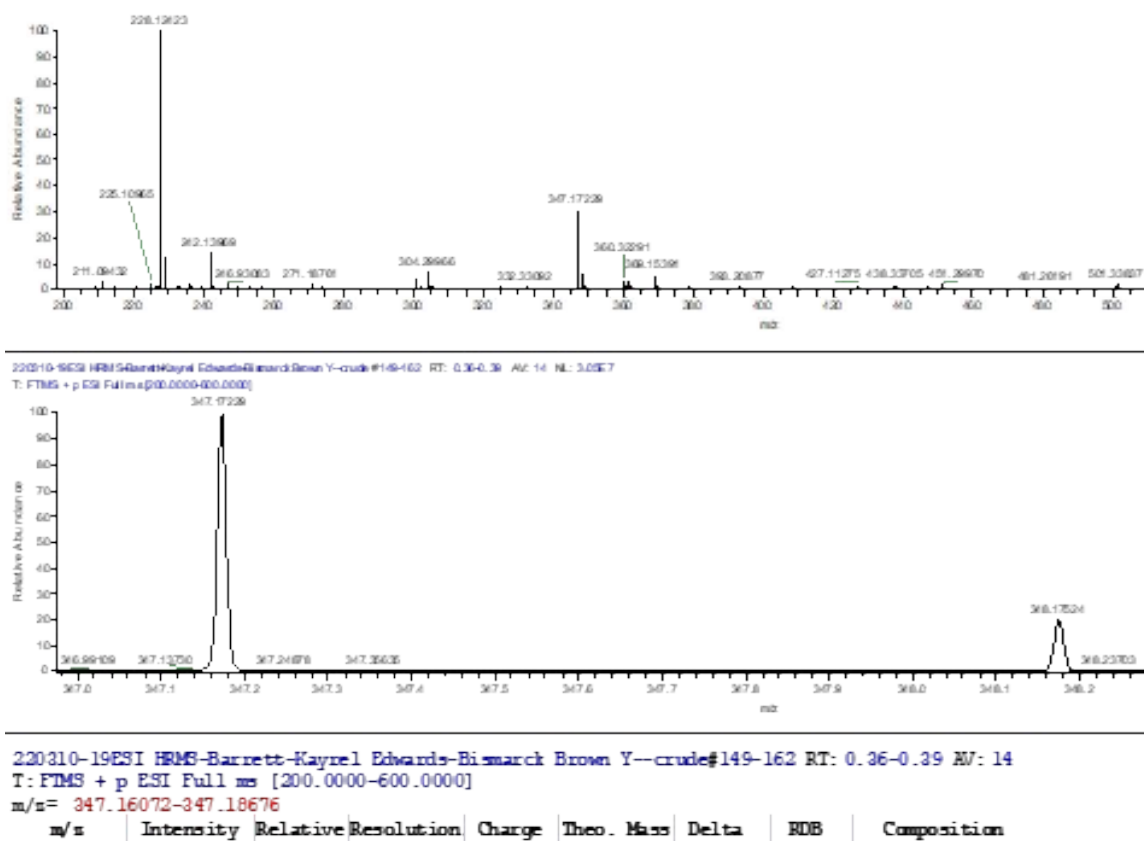

Figure S3. Mass spectra of crude BBY.

- Crude BBY (ESI +p, m/z= 347 (C<sub>18</sub>H<sub>19</sub>N<sub>8</sub>), 228 (C<sub>12</sub>H<sub>14</sub>N<sub>5</sub>), 242 (C<sub>13</sub>H<sub>16</sub>N<sub>5</sub>), expected mass (C<sub>18</sub>H<sub>18</sub>N<sub>8</sub>·2HCl, FW=419.3 g/mol).
- Recrystallized BBY (ESI +p, m/z= 347 (C<sub>18</sub>H<sub>19</sub>N<sub>8</sub>), 228 (C<sub>12</sub>H<sub>14</sub>N<sub>5</sub>), 242 (C<sub>13</sub>H<sub>16</sub>N<sub>5</sub>), expected mass (C<sub>18</sub>H<sub>18</sub>N<sub>8</sub>·2HCl, FW=419.3 g/mol)
- Chrysoidine (ESI +p, m/z= 213 (C<sub>12</sub>H<sub>13</sub>N<sub>4</sub>), expected mass (C<sub>12</sub>H<sub>12</sub>N<sub>4</sub>·HCl, FW=248 g/mol).

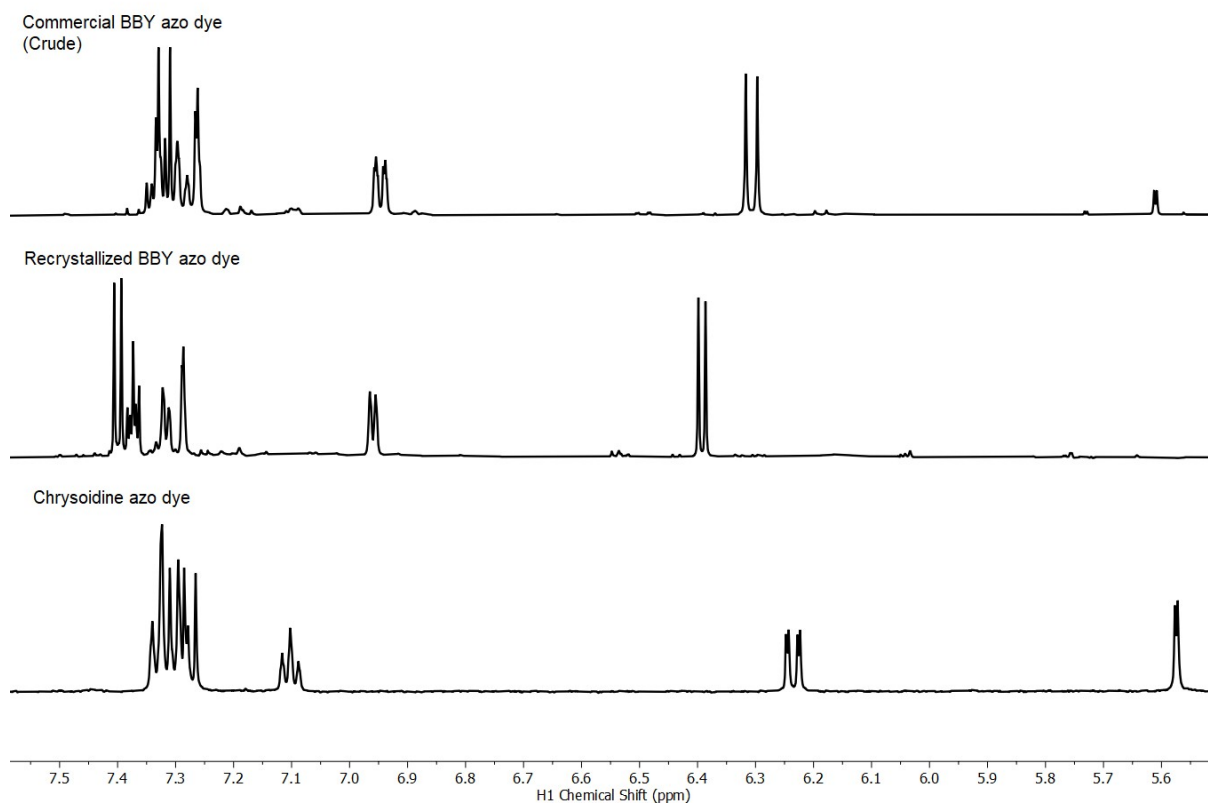

**Figure S4.**  $^1\text{H}$  - NMR spectra of crude commercial BBY, recrystallized BBY, and Chrysoidine azo dyes.

- Crude commercial BBY azo dye (500 MHz,  $\text{D}_2\text{O}$ )  $\delta$  7.37 – 7.24 (m, 4H), 6.98 – 6.92 (m, 1H), 6.31 (d,  $J = 9.9$  Hz, 1H).
- Recrystallized BBY azo dye (800 MHz,  $\text{D}_2\text{O}$ )  $\delta$  7.40 (d,  $J = 9.9$  Hz, 2H), 7.39 – 7.35 (m, 2H), 7.32 (dd,  $J = 8.1, 2.2$  Hz, 1H), 7.29 (t,  $J = 2.2$  Hz, 1H), 6.96 (dd,  $J = 8.0, 2.1$  Hz, 1H), 6.39 (d,  $J = 9.9$  Hz, 2H).
- Chrysoidine azo dye (500 MHz,  $\text{D}_2\text{O}$ )  $\delta$  7.37 – 7.24 (m, 5H), 7.11 (d,  $J = 7.2$  Hz, 1H), 6.24 (dd,  $J = 9.9, 2.3$  Hz, 1H), 5.57 (d,  $J = 2.3$  Hz, 1H).

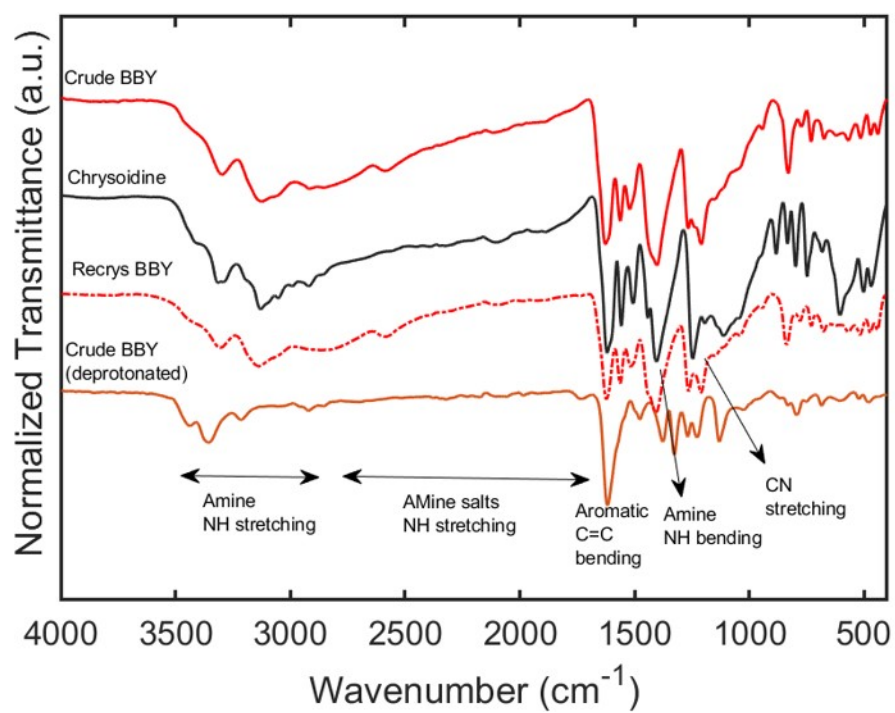

**Figure S5.** FTIR spectra of crude commercial BBY, Chrysoidine, recrystallized BBY and crude BBY (deprotonated) azo dyes.

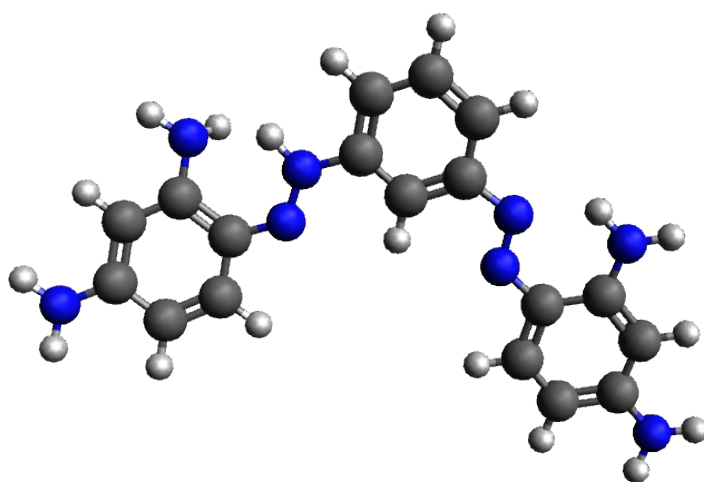

**Figure S6.** DFT optimized geometry of the protonated EE (*trans*) isomer of BBY.

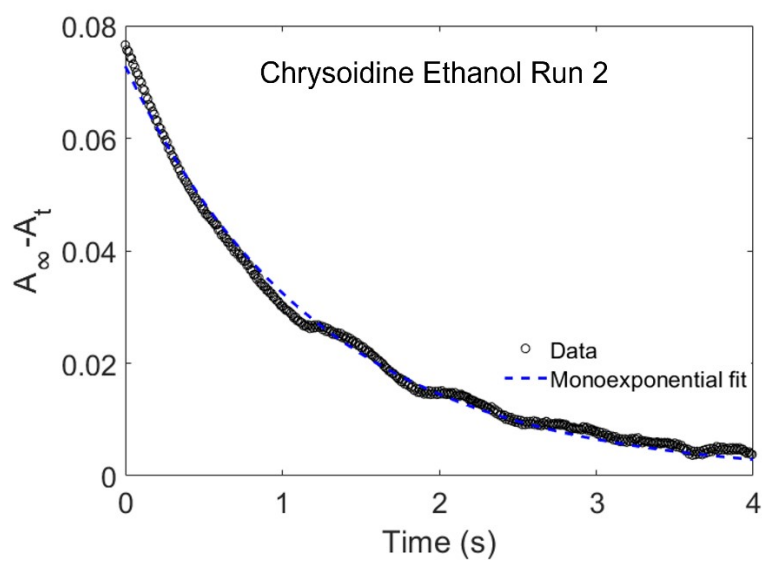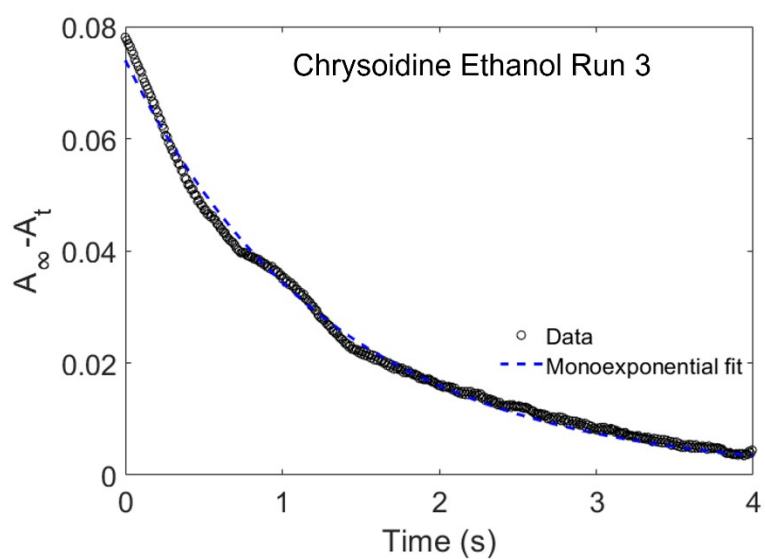

**Figure S7.** Runs '2' and '3' showing the decay of *cis* isomer fit to monoexponential kinetics of Chrysoidine.



## Energy Profile

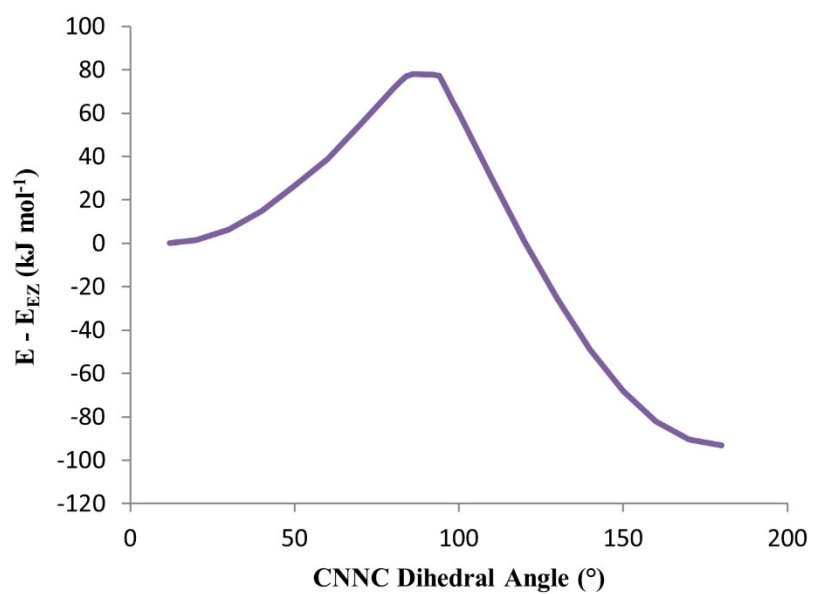

**Figure S8.** Energy profile showing a typical monotonic rise from the *cis* isomer to the activation energy, followed by a monotonic fall to the *trans* isomer, as a plot of relative Energy vs CNNC bond angle.
